1 **Interleukin-17A Secreted from the Lung-infiltrating T Helper 17 Cells Renders Protective**  
2 **Immunity to Pulmonary *Cryptococcus neoformans* Infection**

3

4 **Elaheh Movahed,<sup>a</sup> Grace Min Yi Tan,<sup>a</sup> Heng Choon Cheong,<sup>a</sup> Chalystha Yie Qin Lee,<sup>a</sup> Yi**  
5 **Ying Cheok,<sup>a</sup> Sun Tee Tay,<sup>a</sup> Pei Pei Chong,<sup>b</sup> Won Fen Wong,<sup>a\*</sup> and Chung Yeng Looi<sup>b</sup>**

6

7 <sup>a</sup> Department of Medical Microbiology, Faculty of Medicine, University of Malaya, Kuala  
8 Lumpur, Malaysia

9 <sup>b</sup> School of Bioscience, Taylor's University, Subang Jaya, Selangor, Malaysia

10

11 \*Address correspondence to Won Fen Wong.

12 wonfen@um.edu.my

13

14 **Running title:** Lung TH17 secretes IL-17A in *C. neoformans* infection

15

16 **ABSTRACT**

17 IL-17A has emerged as a key player in the pathologies of inflammation, autoimmune disease,  
18 and immunity to microbes since its discovery two decades ago. In this study, we aim to elucidate  
19 the activity of IL-17A in the protection against *Cryptococcus neoformans*, an opportunistic  
20 fungus that causes fatal meningoencephalitis among AIDS patients. For this purpose, we  
21 examined if *C. neoformans* infection triggers IL-17A secretion in the *in vitro* setting using  
22 RAW264.7 murine macrophage cells, and *in vivo* using wildtype C57BL/6 mice. In addition, an  
23 enhanced green fluorescence protein (eGFP) reporter and a knockout (KO) mouse models were  
24 used to track the source of IL-17A secretion and explore the protective function of IL-17A,  
25 respectively. Our findings showed that both *in vivo* and *in vitro* models of *C. neoformans*  
26 infection demonstrated induction of abundant IL-17A secretion. By examining the lung  
27 bronchoalveolar lavage fluid (BALF), mediastinal lymph node (mLN) and spleen of the IL-17A–  
28 EGFP reporter mice, we showed that intranasal inoculation with *C. neoformans* promoted  
29 leukocytes lung infiltration. A large proportion (~50%) of the infiltrated CD4<sup>+</sup> helper T cell  
30 population secreted EGFP, indicating vigorous T<sub>H</sub>17 activity in the *C. neoformans*–infected lung.  
31 The infection study in IL-17A–KO mice, on the other hand, revealed that absence of IL-17A  
32 marginally boosted fungal burden in the lung and accelerated the mouse death. Therefore, our  
33 data suggest that IL-17A, released predominantly from T<sub>H</sub>17 cells *in vivo*, is essential in  
34 providing a protective immunity against *C. neoformans* infection.

35

36 **KEYWORDS** CD4<sup>+</sup> T cells, T<sub>H</sub>17 cells, macrophages, IL-17A, *Cryptococcus neoformans*

37

## 38 INTRODUCTION

39 The opportunistic pathogenic basidiomycete *Cryptococcus neoformans* is an encapsulated yeast  
40 commonly found in bird excrement worldwide (1). The infection is often asymptomatic in  
41 healthy individuals but causes severe pulmonary cryptococcosis and life-threatening  
42 meningoencephalitis in immunocompromised patients. *C. neoformans* has gained attention in  
43 recent years as it is a major cause of death among patients who have advanced acquired  
44 immunodeficiency syndrome (AIDS) (2). Hence, it is important to study the host interaction with  
45 this pathogen as 30-60% of the patients who have cryptococcal meningitis succumb to  
46 cryptococcosis infection within one year despite antifungal therapy (3).

47 The early interaction between innate immune cells and cryptococci is critical in  
48 determining the outcome of cryptococcosis (4). The presence of *C. neoformans* cells or its  
49 major capsular polysaccharide glucuronoxylomannan promotes NF- $\kappa$ B nuclear translocation and  
50 activation in the macrophages (5), which subsequently induces secretion of cytokines including  
51 tumor necrosis factor alpha (TNF- $\alpha$ ) and transforming growth factor  $\beta$  (TGF- $\beta$ ) (6). Activated  
52 macrophage or other phagocytes are able to eliminate most of the engulfed pathogens via  
53 formation of phagolysosome, nitric oxide and reactive oxygen activities. As with other  
54 successful pathogens such as *Helicobacter pylori*, *C. neoformans* has evolved a number of  
55 elaborate strategies to evade immune destruction by macrophages (7). The encapsulated *C.*  
56 *neoformans* can defend itself against the onslaught of macrophages through non-lytic expulsion  
57 (8, 9), a process that involves alteration of host cell Arp2/3 complex-mediated actin  
58 polymerization and phagosome pH (10, 11), thereby allowing the pathogen to survive and  
59 propagate within macrophages. *C. neoformans*-activated macrophage often displays an M1-like  
60 phenotype (12) whose polarization is highly plastic depending on external signals such as

61 cytokines (13). *C. neoformans* intervenes in the polarization of macrophages by using Ssa1, a  
62 heat shock protein 70 homolog to drive macrophage development toward the alternative M2  
63 phenotype that is defective in the fungal clearance (14). These processes impair the host innate  
64 immune system and promote the invasion and dissemination of *C. neoformans* in the host.

65         The essential role of T cells in the host immune response to *C. neoformans* has been well-  
66 studied using T cell depletion mouse model (15-17). In the era of two distinct helper T ( $T_H$ )  
67 paradigm,  $T_{H1}$  or  $T_{H2}$ , most findings are in agreement that protective immune response against  
68 the fungus is principally driven by  $T_{H1}$  cells, whereby IL-12 and IL-18 potentiate  $T_{H1}$   
69 polarization and interferon- $\gamma$  (IFN- $\gamma$ ) and TNF- $\alpha$  release which contribute to fungal clearance  
70 (18-20). Some studies suggest the involvement of  $T_{H2}$  as IL-4 is detected in high quantity in  
71 mice infected with highly virulent strain at 2 to 3 weeks post infection (21, 22). A dominant  $T_{H2}$   
72 cytokine profile has been associated with increased cryptococcal proliferative potential (23). IL-4  
73 and IL-13 released by  $T_{H2}$  or eosinophils in lung could also cause fatal allergic inflammation  
74 during bronchopulmonary mycosis (24, 25), a reaction which is dampened by IL-23 through an  
75 IL-17A-independent and -dependent mechanisms (26). Following the recent breakthrough in T  
76 cell subsets discovery, a relatively new T cell subset,  $T_{H17}$ , has also been implicated in the  
77 immune response to fungus (27, 28). A study has also challenged the role played by IL-17A in  
78 anti-fungal response and claimed that IL-17A promotes the fungal infection (29), as such, the  
79 nature and role of these T cell subsets require further investigations.  $T_{H17}$  cell is characterized by  
80 its hallmark ROR $\gamma$ t transcription factor and IL-17 secretion. Its differentiation from naïve  $CD4^+$   
81 T cells is induced in the presence of IL-6 and TGF- $\beta$  during inflammatory response. IL-23 is  
82 another important inducer for IL-17A as the IL-17A production was strongly impaired in the IL-

83 23p19 deficient mice (30). *C. gattii*, a highly virulent cryptococcal species is able to attenuate  
84 both T<sub>H</sub>1 and T<sub>H</sub>17 by suppressing *IL-12* and *IL-23* genes transcription (31).

85 T<sub>H</sub>17 is not the sole source of IL-17A as it can also be released by other cells such as  
86 macrophages, NK cells, and neutrophils (32). IL-17A elicits inflammatory response by recruiting  
87 neutrophils, but does not contribute to classical macrophage activation as seen in pulmonary  
88 cryptococcosis induction in the mouse model (33). T<sub>H</sub>17 cells release a panel of other cytokines  
89 in addition to IL-17 such as IL-17F, IL-22, and IL-23. A full picture of regulatory mechanism as  
90 to how this subset of T cell interacts and eliminates the fungal infection requires further  
91 investigation. In this study, we examined the association of IL-17A with *C. neoformans* infection  
92 by using both *in vitro* and *in vivo* infection models. The main focus of our study lies on  
93 identifying the source of IL-17A secretion and determining its protective role in *C. neoformans*-  
94 infected mice. Using enhanced green fluorescence protein (eGFP) reporter mouse model, we  
95 showed that lung infiltrating T<sub>H</sub>17 cells are likely the predominant source of IL-17A. Data from  
96 a knockout (KO) mouse model supports a protective function of the IL-17A against *C.*  
97 *neoformans* infection.

98

## 99 RESULTS

100 ***C. neoformans* infection induces IL-17A production in both *in vitro* and *in vivo***  
101 **models.** To examine if *IL-17A* gene transactivation is induced by *C. neoformans* infection,  
102 RAW264.7 mouse macrophage cells were first cultured with *C. neoformans* H99 strain at MOI  
103 5:1 for 24 hours followed by quantitative real-time PCR. Intriguingly, the relative expression  
104 level of IL-17 to  $\beta$ -actin was drastically increased at 4.4-fold in the *C. neoformans*-infected cells  
105 compared to the non-infected control (Fig. 1). The relative expression levels for other cytokines,

106 i.e. IL-6 and IFN- $\gamma$  were also increased at 3.2- and 2.0-fold respectively, indicating initiation of  
107 pro-inflammatory response along with T<sub>H</sub>1- and T<sub>H</sub>17-inducing cytokines upon *C. neoformans*  
108 infection.

109 To investigate if *C. neoformans* infection-mediated IL-17A secretion occurs *in vivo*,  
110 C57BL/6 mice were intranasally inoculated with four different strains of *C. neoformans* (H99,  
111 S48B, S68B and H4) at  $2 \times 10^5$  cells for 14 days before collecting serum for cytokine  
112 measurement (Fig. 2). Consistent with the data from *in vitro* infection, an elevated serum level of  
113 IL-17A was detected in the *C. neoformans*-infected mice (Fig. 2A). We noted that the serum IL-  
114 17A level was correlated with the degree of virulence of different *C. neoformans* strains (34),  
115 whereby the highest amount of serum IL-17A was observed in the group of mice infected with  
116 the most virulent *C. neoformans* H99 strain ( $115 \pm 12$  pg/ml). This was followed by moderate  
117 serum IL-17A level observed in the mice infected with less virulent environmental strains, S48S  
118 ( $89 \pm 3$  pg/ml) and S68B ( $75 \pm 2$  pg/ml), and lowest level of serum IL-17A was noted in the  
119 mice infected with non-virulent strain H4 ( $24 \pm 1$  pg/ml) strains, compared to control uninfected  
120 mice ( $<20$  pg/ml). The level of serum IL-23 was also elevated in all *C. neoformans*-infected  
121 mice, i.e. H99 ( $67 \pm 5$  pg/ml), S48S ( $78 \pm 3$  pg/ml), S68B ( $36 \pm 1$  pg/ml) and H4 ( $47 \pm 5$  pg/ml)  
122 compared to  $<20$  pg/ml in the mock control (Fig. 2B). This suggests IL-23-IL-17A axis pathway  
123 plays a major role in the host immunity against *C. neoformans* infection. On the other hand, the  
124 serum IL-17F levels were only scarcely increased in mice infected with *C. neoformans* H99 and  
125 S48B strains (Fig. 2C), while no noteworthy induction was observed for other cytokines (MIP-3 $\alpha$ ,  
126 IL-21, IL-31 and IL-33) examined (data not shown).

127

128           **Intranasal *C. neoformans* inoculation causes leukocytes lung infiltration.** To examine  
129 the importance of IL-17 in providing immunity to *C. neoformans* infection, we utilized a mouse  
130 model harboring IRES-EGFP-SV40-polyA signal sequence cassette after the stop codon of *Il-*  
131 *17a* gene in which the EGFP is co-expressed in the IL-17A-producing cells. Mice were  
132 intranasally administrated with 20  $\mu$ l of control PBS or *C. neoformans* ( $2 \times 10^5$  cells) in  
133 suspension, and splenic, mediastinal lymph nodes (mLN), bronchoalveolar lavage fluid (BALF)  
134 cells were inspected after 4 weeks (Fig. 3). Total numbers of cells were significantly increased in  
135 the BALF ( $4.8 \times 10^6 \pm 1.0 \times 10^6$  versus  $4.6 \times 10^4 \pm 1.0 \times 10^4$  cells,  $*P=0.0135$ ) and mLN ( $3.0 \times$   
136  $10^5 \pm 2.0 \times 10^4$  versus  $1.5 \times 10^5 \pm 1.9 \times 10^4$  cells,  $**P=0.0017$ ) of the *C. neoformans* H99-  
137 infected mice versus the control group (Fig. 3A and 3B). No significant increased numbers of  
138 cells were observed in the spleen after intranasal *C. neoformans* H99 infection ( $5.6 \times 10^7 \pm 7.1 \times$   
139  $10^6$  versus  $4.7 \times 10^7 \pm 6.1 \times 10^6$ ,  $P=0.46$ ), suggesting localized infection (Fig. 3C).

140           In the BALF from the *C. neoformans*-infected mice, active immune response was noted  
141 as all types of leukocytes examined, except CD8<sup>+</sup> T cells demonstrated an average of 2-fold  
142 increment (Fig. 3D). No significant differences of the cell constituents were observed in lymph  
143 node (data not shown). In spleen, the percentages of innate immune cells i.e. macrophages  
144 (CD11b<sup>+</sup>F4/80<sup>+</sup>), neutrophils (CD11b<sup>+</sup>Gr1<sup>hi</sup>) and inflammatory monocytes (CD11b<sup>+</sup>Gr1<sup>int</sup>) were  
145 increased at approximately 3- to 6-fold. On the contrary, percentages of T (both CD4<sup>+</sup> and  
146 CD8<sup>+</sup>) cells were slightly reduced at 1.2- to 1.3-fold (data not shown).

147

148           **Increased IL-17A-producing T cells in the lung of *C. neoformans* H99-infected mice.**

149 In the GFP in IL-17A-EGFP reporter mice, IL-17A-producing cells can easily be identified as  
150 they display EGFP fluorescence, hence this mouse model was utilized to determine the main

151 source of IL-17 during *C. neoformans* infection. Our result showed that there was no profound  
152 increase of GFP<sup>+</sup> cells amongst macrophage, neutrophil or inflammatory monocytes populations  
153 in the *C. neoformans*-infected mice (data not shown). On the contrary, significant increases of  
154 GFP<sup>+</sup> cells were observed among the T cells (Fig. 4). Major source of IL-17A was derived from  
155 CD3<sup>+</sup>CD4<sup>+</sup> but not CD3<sup>+</sup>CD8<sup>+</sup> T cells. Almost half ( $54.2 \pm 11.6$  %,  $***P=0.0008$ ) of the total  
156 lung infiltrated CD3<sup>+</sup>CD4<sup>+</sup> T cells recovered in BALF collected from *C. neoformans* H99-  
157 infected mice were GFP<sup>+</sup>, compared to only  $4.8 \pm 0.8$ % in the control (Fig. 4A). In the mLN, the  
158 percentages of GFP<sup>+</sup> CD3<sup>+</sup>CD4<sup>+</sup> cells were approximately 4-fold greater at  $21.7 \pm 1.4$  %  
159 ( $P<0.0001$ ) cells, compared to  $5.1 \pm 0.6$  % in control mice (Fig. 4B). The percentages of GFP<sup>+</sup>  
160 cells among CD3<sup>+</sup>CD4<sup>+</sup> population were also marginally increased ( $17.53 \pm 4.1$  %,  $P=0.016$ )  
161 among the splenic CD4<sup>+</sup> T cells compared to  $6.1 \pm 0.6$  % in the control (Fig. 4C).

162

163 **IL-17 provides protective immunity to pulmonary *C. neoformans* infection.** A knock  
164 out mouse model was then applied to examine the protective role of IL-17 to host during *C.*  
165 *neoformans* infection. Intranasal inoculation of *C. neoformans* in wildtype C57/BL6 mice and IL-  
166 17A-KO resulted in mice death starting from day 26 and 24, respectively. In IL-17A-KO mice,  
167 more than 80% (5 out of 6) mice died on day 34 whereas in wildtype control, this was observed  
168 at day 40 (Fig. 5A). The amounts of fungal cells in the local infection site (lung) as well as  
169 systemic infection (brain) were assessed. CFU counts in the lung derived from IL-17KO mice  
170 stayed at  $657 \pm 92$ , a higher level compared to  $473 \pm 119$  in the wildtype control, whereas CFU  
171 count in the brain was  $237 \pm 39$  compared to  $133 \pm 30$  in the control mice (Fig. 5B). Hence, the  
172 absence of IL-17A accelerated mice death as a result of an increased CFU count, suggesting its  
173 protective role against *C. neoformans* invasion.



174

## 175 **DISCUSSIONS**

176 Increasing prevalence of mortality attributed to cryptococcal meningitis in the  
177 immunocompromised patients underscores the importance of elucidating the host defense–  
178 pathogen interaction. In this study, we focused on (i) determining the expression and source of  
179 elevated IL-17A from different types of immune cells using a IL-17A–GFP reporter animal  
180 model and, (ii) investigating the role of IL-17A in protective immunity using a IL-17A–KO  
181 mouse model. Our data demonstrated elevated serum levels of T<sub>H</sub>17 cytokines, i.e. IL-17A and  
182 IL-23 in the infected wild-type C57BL/6 mice; and proposed the lung–infiltrating T<sub>H</sub>17 subset as  
183 the major source for IL-17A secretion at the lung upon pulmonary *C. neoformans* infection. In  
184 addition, we also showed that the absence of IL-17A resulted in a greater fungal burden and  
185 accelerated death of the infected mice, which implies a protective role of the potent IL-17A  
186 response at an early stage of *C. neoformans* infection.

187         Although a high level of IL-17A was detected in the *in vitro* infection model using  
188 RAW264.7 macrophage cell line in this study, similar level of expression was not observed in  
189 the macrophages of *in vivo* animal infection model with the eGFP reporter system. Classical  
190 macrophage activation is not affected in the IL-17A–depleted mice upon pulmonary  
191 cryptococcal stimulation, hence IL-17A may not be derived from the activated macrophages  
192 (33). Instead, other cells like neutrophils and T cells may serve as the predominant leukocytic  
193 source of IL-17A (35). Human monocytes derived from healthy donors exhibited an extensive  
194 modification of transcriptome level upon incubation with *C. neoformans*, in particular the genes  
195 related to TNF- $\alpha$ , NF- $\kappa$ B, Jak-Stat and toll-like receptors pathways (36). Pro-inflammatory  
196 cytokine IL-1 $\beta$  is one of the top up-regulated cytokines in the *C. neoformans*–infected

197 macrophages, and a deficiency in IL-1R1 results in defective T<sub>H</sub>17 cytokines secretion (37). This  
198 suggests that in the *in vivo* condition, macrophages may not directly release IL-17A but could  
199 instead be involved in indirect induction of IL-17A secretion from other immune cells through  
200 the release of pro-inflammatory cytokines such as IL-1 $\beta$ .

201 Most studies thus far pinpoint the association of T<sub>H</sub>1-type cytokine responses with  
202 protective immunity against pulmonary cryptococcosis (38-40). The cytokines in response were  
203 mainly those of T<sub>H</sub>1 subsets (IFN- $\gamma$ , TNF $\alpha$ , IL-8), whereas moderate increases were also  
204 observed in T<sub>H</sub>2 (IL-4) and T<sub>H</sub>17 cytokines (IL-17A) (41). A predominant T<sub>H</sub>1 and/or T<sub>H</sub>17  
205 cytokine profile limits the growth of *C. neoformans* and *C. gattii*, whereas a T<sub>H</sub>2 cytokine profile  
206 promotes intracellular fungus proliferation (23). In humans, it has also been reported that  
207 cryptococcal-specific CD4<sup>+</sup> T-cell response is predominantly a T<sub>H</sub>1 type response with minimal  
208 involvement of T<sub>H</sub>2 and T<sub>H</sub>17 cells (41). However, patients with higher IFN- $\gamma$  or TNF- $\alpha$   
209 production showed greater level of IL-17A level in their cerebrospinal fluid (CSF). These  
210 patients demonstrated lower fungal burdens and faster clearance of *C. neoformans* infection,  
211 suggesting that both T<sub>H</sub>1 and T<sub>H</sub>17 responses worked cooperatively to provide optimal immunity  
212 against pulmonary cryptococcosis.

213 Our findings from IL-17A-KO mice experiment are in concordance with previous studies  
214 which showed that pulmonary fungal burden was resolved at a slower rate, and the overall  
215 survival was not deteriorated due to IL-17A deficiency (33, 35). Besides, higher fungal  
216 dissemination to the brain was also observed in the surviving IL-17A-depleted mice, consistent  
217 with a previous finding (35). These data support that IL-17A participates in providing protective  
218 anti-cryptococcal host defenses through the suppression of fungal growth and dispersal. This  
219 observation is in line with other studies on several other fungal species (42-44). It was shown

220 that a deficiency in IL-17A response results in increased susceptibility to oropharyngeal and  
221 disseminated candidiasis (27, 45). Decreased neutrophil infiltration, increased fungal burden, and  
222 exacerbated pathology were reported upon IL-17A neutralization in *C. albicans* and *Aspergillus*  
223 *fumigatus* infections (42-44). Toll IL-1R8 (TIR8), another negative regulator of T<sub>H</sub>17 response,  
224 has also been shown to reduce the susceptibility and immunopathology to candidiasis (46). Some  
225 studies, on the contrary, provide evidence that outcome of aspergillosis in human is independent  
226 of T<sub>H</sub>17 responses (29), and the IL-23/IL-17A–driven inflammation could impede antifungal  
227 immune resistance and promote infection of *A. fumigatus* (47). Hence, further investigation is  
228 necessary to validate the precise function of T<sub>H</sub>17 immunity towards fungal infection in humans.

229 In summary, our data suggest that IL-17A derived from the lung infiltrating T<sub>H</sub>17 in  
230 BALF and mLN, plays a supportive role in rendering protection to pulmonary *C. neoformans*  
231 infection. Understanding the host immune response during cryptococcal infection is essential for  
232 the development of immunomodulatory therapies.

233

## 234 MATERIALS AND METHODS

235 **Fungal and cell culture.** *C. neoformans var. grubii* (serotype A) H99 and RAW264.7  
236 murine monocytic macrophage cell-line were obtained from American Type Culture Collection  
237 (ATCC). Environmental strains S48B, S68B and H4 were isolated from pigeon droppings, as  
238 described (48, 49). To start the culture, a small drop of fungal cell stock was streaked on the  
239 Sabouraud's dextrose agar (SDA) and incubated at 37°C for 48 hours. Then, 2 to 3 single  
240 colonies from freshly prepared agar plate were inoculated into Sabouraud's dextrose broth (SDB)  
241 and incubated at 37°C for 48 hours. RAW264.7 cells were cultured in Dulbecco's Modified  
242 Essential Medium (DMEM) supplemented with 10 % fetal bovine serum and incubated at 37°C,

243 5% CO<sub>2</sub>. For *in vitro* infection, RAW264.7 cells were seeded at  $5.0 \times 10^5$  cells/ml and infected  
244 with *C. neoformans* at multiplicity of infection (MOI) of 5 for 24 hours.

245 **Quantitative real-time PCR.** RNA was isolated from cells as described previously (7).  
246 Briefly, 1 ml TRIzol Reagent (Invitrogen, Carlsbad, CA) and 200  $\mu$ l chloroform were added to  
247 cells and vortexed vigorously for 15 sec. The upper phase was collected and precipitated with  
248 isopropanol, washed with 70% ethanol and dissolved in RNase-free water. Then, cDNA was  
249 generated using MMLV reverse transcriptase (Life Technologies). Samples were amplified with  
250 SsoAdvanced™ SYBR® Green Supermix (Biorad) using StepOnePlus™ Real-Time PCR  
251 Systems (Life Technologies) using the following PCR cycling parameters: 95°C for 10 min, 40  
252 cycles at 95°C for 15 sec each, and 60°C for 1 min. Data were analyzed using StepOne software  
253 version 2.3. Primer sequences used were *IL-17A* (5'-TCTCCACCGCAATGAAGACC-3' and  
254 5'-CACACCCACCAGCATCTTCT-3'), *IL-6* (5'-CCTCTGGTCTTCTGGAGTACC-3' and  
255 5'-ACTCCTTCTGTGACTCCAGC-3' and *IFN- $\gamma$*  (5'-TTCTTCAGCAACAGCAAGGC-3' and  
256 5'-TCAGCAGCGACTCCTTTTCC-3'). The fold change for each transcript relative to  $\beta$ -actin  
257 housekeeping gene was calculated using the  $2^{-\Delta\Delta CT}$  method.

258 **Animals.** Wild type C57BL/6, IL-17A–eGFP (*C57BL/6-Il-17a<sup>tm1Bcgen</sup>/J*) and IL-17A–KO  
259 (STOCK *Il-17a<sup>tm1.I(ire)Stock</sup>/J*) mice were obtained from Jackson Laboratory (Bar Harbor, ME).  
260 IL17A–eGFP mice contain an IRES-eGFP-SV40-polyA signal sequence cassette inserted after  
261 stop codon of *Il-17a* gene and express eGFP as a marker of IL-17A activity. Whereas IL-17A–  
262 KO mice contained abolished IL-17A expression due to insertional mutation of a codon  
263 optimized Cre-recombinase and a polyA signal into exon 1 of *Il-17a* gene. Groups of 4 to 6 mice  
264 at age 8-12 weeks old were used throughout the study. All mice were maintained in individually  
265 ventilated cages under specific pathogen free condition. Mice were euthanized with CO<sub>2</sub>

266 inhalation when they exhibited overt signs including hunched posture, fur ruffling, weakness,  
267 increased respiratory rate and difficulty breathing. This study has been approved by the Faculty  
268 of Medicine Ethics Committee for Animal Experimentation at the University of Malaya.

269 ***In vivo* infection.** Fresh cultures of *C. neoformans* were washed and harvested by  
270 centrifugation at 1800 ×g for 10 min. Cells were adjusted to 10<sup>7</sup> cells/ml in phosphate buffer  
271 saline (PBS) using a hemocytometer. Mice were first anesthetized with intraperitoneal injection  
272 of a mixture of ketamine (90 mg/kg) and xylazine (10 mg/kg) before inoculated with intranasal  
273 pipetting of 20 µl (2 × 10<sup>5</sup> cells) yeast suspension. For survival study, each infected mouse was  
274 examined daily from 2 to 6 weeks post infection. For other study, mice were euthanized with  
275 CO<sub>2</sub> inhalation at 28 days post-infection and serum was collected from blood. Lung was lavaged  
276 with 1.0 ml PBS and BALF was collected. Lung, mediastinal lymph nodes (mLN), spleen and  
277 brain were excised for further analysis.

278 **CFU count.** Brain and lungs from the mice were excised, weighed and homogenized in 1  
279 ml PBS using glass slides. A total volume of 20 µl of the serially diluted homogenates (at 10,  
280 100 and 1000 folds) were plated on SDA plates in duplicates and cultured at 30°C for 48 hours.  
281 Fungal load was quantified using colony forming unit (CFU) per ml by calculating yeast colonies  
282 on each plate.

283 **Bioplex assay.** Sera from each mouse were collected for measurement of cytokines using  
284 Bio-plex Pro Mouse Th17 assay (Bio-rad, CA, USA) which included the following cytokines:  
285 IL-17A, IL-17F, IL-21, IL-22, IL-23, IL-31, IL-33 and MIP-3α according to the manufacturer's  
286 instructions. The Multiplex bead working solution was diluted from 25× stock solution beads  
287 and 50 µl of it was added into each well followed by 50 µl of sample. Each cytokine standards  
288 and samples were assayed in duplicate as provided by manufacturer. Samples with microbeads

289 were incubated at room temperature on a magnetic microplate shaker for 30 minutes. After  
290 incubation, Bio-Plex detection antibody working solution was then added, washed 3× with Bio-  
291 Plex wash buffer and finally 1× streptavidin-PE was added before reading the plate on the Bio-  
292 Plex 200 system (Bio-Rad). Cytokine concentrations from each tissue homogenates were  
293 calculated based on each cytokine standard curve.

294 **Statistics.** All statistical analyses were performed using GraphPad Prism 6. Analyses  
295 between groups were performed using Student's *t*-test, whereby a *P* value of <0.05 was  
296 considered statistically significant.

297

## 298 **ACKNOWLEDGEMENTS**

299 This work was supported by University of Malaya Research Grant (RG525-13HTM) and  
300 Fundamental Research Grant Scheme (FRGS, FP014-2017A). Movahed E. was supported by a  
301 postgraduate research fund (PPP) from University of Malaya.

302

303 **REFERENCES**

- 304 1. May RC, Stone NR, Wiesner DL, Bicanic T, Nielsen K. 2016. Cryptococcus: from environmental  
305 saprophyte to global pathogen. *Nat Rev Microbiol* 14:106-17.
- 306 2. Mitchell TG, Perfect JR. 1995. Cryptococcosis in the era of AIDS--100 years after the discovery of  
307 *Cryptococcus neoformans*. *Clin Microbiol Rev* 8:515-48.
- 308 3. Jarvis JN, Harrison TS. 2007. HIV-associated cryptococcal meningitis. *AIDS* 21:2119-29.
- 309 4. Bojarczuk A, Miller KA, Hotham R, Lewis A, Ogryzko NV, Kamuyango AA, Frost H, Gibson RH,  
310 Stillman E, May RC, Renshaw SA, Johnston SA. 2016. *Cryptococcus neoformans* Intracellular  
311 Proliferation and Capsule Size Determines Early Macrophage Control of Infection. *Sci Rep*  
312 6:21489.
- 313 5. Hayes JB, Sircy LM, Heusinkveld LE, Ding W, Leander RN, McClelland EE, Nelson DE. 2016.  
314 Modulation of Macrophage Inflammatory Nuclear Factor kappaB (NF-kappaB) Signaling by  
315 Intracellular *Cryptococcus neoformans*. *J Biol Chem* 291:15614-27.
- 316 6. Oliveira DL, Freire-de-Lima CG, Nosanchuk JD, Casadevall A, Rodrigues ML, Nimrichter L. 2010.  
317 Extracellular vesicles from *Cryptococcus neoformans* modulate macrophage functions. *Infect*  
318 *Immun* 78:1601-9.
- 319 7. Tan GM, Looi CY, Fernandez KC, Vadivelu J, Loke MF, Wong WF. 2015. Suppression of cell  
320 division-associated genes by *Helicobacter pylori* attenuates proliferation of RAW264.7  
321 monocytic macrophage cells. *Sci Rep* 5:11046.
- 322 8. Ma H, Croudace JE, Lammas DA, May RC. 2006. Expulsion of live pathogenic yeast by  
323 macrophages. *Curr Biol* 16:2156-60.
- 324 9. Alvarez M, Casadevall A. 2006. Phagosome extrusion and host-cell survival after *Cryptococcus*  
325 *neoformans* phagocytosis by macrophages. *Curr Biol* 16:2161-5.

- 326 10. Johnston SA, May RC. 2010. The human fungal pathogen *Cryptococcus neoformans* escapes  
327 macrophages by a phagosome emptying mechanism that is inhibited by Arp2/3 complex-  
328 mediated actin polymerisation. *PLoS Pathog* 6:e1001041.
- 329 11. Nicola AM, Robertson EJ, Albuquerque P, Derengowski Lda S, Casadevall A. 2011. Nonlytic  
330 exocytosis of *Cryptococcus neoformans* from macrophages occurs in vivo and is influenced by  
331 phagosomal pH. *MBio* 2.
- 332 12. Davis MJ, Tsang TM, Qiu Y, Dayrit JK, Freij JB, Huffnagle GB, Olszewski MA. 2013. Macrophage  
333 M1/M2 polarization dynamically adapts to changes in cytokine microenvironments in  
334 *Cryptococcus neoformans* infection. *MBio* 4:e00264-13.
- 335 13. Arora S, Olszewski MA, Tsang TM, McDonald RA, Toews GB, Huffnagle GB. 2011. Effect of  
336 cytokine interplay on macrophage polarization during chronic pulmonary infection with  
337 *Cryptococcus neoformans*. *Infect Immun* 79:1915-26.
- 338 14. Eastman AJ, He X, Qiu Y, Davis MJ, Vedula P, Lyons DM, Park YD, Hardison SE, Malachowski AN,  
339 Osterholzer JJ, Wormley FL, Jr., Williamson PR, Olszewski MA. 2015. Cryptococcal heat shock  
340 protein 70 homolog Ssa1 contributes to pulmonary expansion of *Cryptococcus neoformans*  
341 during the afferent phase of the immune response by promoting macrophage M2 polarization. *J*  
342 *Immunol* 194:5999-6010.
- 343 15. Hill JO, Harmsen AG. 1991. Intrapulmonary growth and dissemination of an avirulent strain of  
344 *Cryptococcus neoformans* in mice depleted of CD4+ or CD8+ T cells. *J Exp Med* 173:755-8.
- 345 16. Huffnagle GB, Yates JL, Lipscomb MF. 1991. Immunity to a pulmonary *Cryptococcus neoformans*  
346 infection requires both CD4+ and CD8+ T cells. *J Exp Med* 173:793-800.
- 347 17. Mody CH, Lipscomb MF, Street NE, Toews GB. 1990. Depletion of CD4+ (L3T4+) lymphocytes in  
348 vivo impairs murine host defense to *Cryptococcus neoformans*. *J Immunol* 144:1472-7.



- 349 18. Snelgrove RJ, Edwards L, Williams AE, Rae AJ, Hussell T. 2006. In the absence of reactive oxygen  
350 species, T cells default to a Th1 phenotype and mediate protection against pulmonary  
351 *Cryptococcus neoformans* infection. *J Immunol* 177:5509-16.
- 352 19. Kawakami K, Koguchi Y, Qureshi MH, Kinjo Y, Yara S, Miyazato A, Kurimoto M, Takeda K, Akira S,  
353 Saito A. 2000. Reduced host resistance and Th1 response to *Cryptococcus neoformans* in  
354 interleukin-18 deficient mice. *FEMS Microbiol Lett* 186:121-6.
- 355 20. Decken K, Kohler G, Palmer-Lehmann K, Wunderlin A, Mattner F, Magram J, Gately MK, Alber G.  
356 1998. Interleukin-12 is essential for a protective Th1 response in mice infected with  
357 *Cryptococcus neoformans*. *Infect Immun* 66:4994-5000.
- 358 21. Jain AV, Zhang Y, Fields WB, McNamara DA, Choe MY, Chen GH, Erb-Downward J, Osterholzer JJ,  
359 Toews GB, Huffnagle GB, Olszewski MA. 2009. Th2 but not Th1 immune bias results in altered  
360 lung functions in a murine model of pulmonary *Cryptococcus neoformans* infection. *Infect*  
361 *Immun* 77:5389-99.
- 362 22. Abe K, Kadota J, Ishimatsu Y, Iwashita T, Tomono K, Kawakami K, Kohno S. 2000. Th1-Th2  
363 cytokine kinetics in the bronchoalveolar lavage fluid of mice infected with *Cryptococcus*  
364 *neoformans* of different virulences. *Microbiol Immunol* 44:849-55.
- 365 23. Voelz K, May RC. 2010. Cryptococcal interactions with the host immune system. *Eukaryot Cell*  
366 9:835-46.
- 367 24. Muller U, Stenzel W, Kohler G, Werner C, Polte T, Hansen G, Schutze N, Straubinger RK, Blessing  
368 M, McKenzie AN, Brombacher F, Alber G. 2007. IL-13 induces disease-promoting type 2  
369 cytokines, alternatively activated macrophages and allergic inflammation during pulmonary  
370 infection of mice with *Cryptococcus neoformans*. *J Immunol* 179:5367-77.

- 371 25. Piehler D, Stenzel W, Grahner A, Held J, Richter L, Kohler G, Richter T, Eschke M, Alber G, Muller  
372 U. 2011. Eosinophils contribute to IL-4 production and shape the T-helper cytokine profile and  
373 inflammatory response in pulmonary cryptococcosis. *Am J Pathol* 179:733-44.
- 374 26. Szymczak WA, Sellers RS, Pirofski LA. 2012. IL-23 dampens the allergic response to *Cryptococcus*  
375 neoformans through IL-17-independent and -dependent mechanisms. *Am J Pathol* 180:1547-59.
- 376 27. Conti HR, Shen F, Nayyar N, Stocum E, Sun JN, Lindemann MJ, Ho AW, Hai JH, Yu JJ, Jung JW,  
377 Filler SG, Masso-Welch P, Edgerton M, Gaffen SL. 2009. Th17 cells and IL-17 receptor signaling  
378 are essential for mucosal host defense against oral candidiasis. *J Exp Med* 206:299-311.
- 379 28. Vautier S, Sousa Mda G, Brown GD. 2010. C-type lectins, fungi and Th17 responses. *Cytokine*  
380 *Growth Factor Rev* 21:405-12.
- 381 29. Chai LY, van de Veerdonk F, Marijnissen RJ, Cheng SC, Khoo AL, Hectors M, Lagrou K, Vonk AG,  
382 Maertens J, Joosten LA, Kullberg BJ, Netea MG. 2010. Anti-*Aspergillus* human host defence relies  
383 on type 1 T helper (Th1), rather than type 17 T helper (Th17), cellular immunity. *Immunology*  
384 130:46-54.
- 385 30. Kleinschek MA, Muller U, Brodie SJ, Stenzel W, Kohler G, Blumenschein WM, Straubinger RK,  
386 McClanahan T, Kastelein RA, Alber G. 2006. IL-23 enhances the inflammatory cell response in  
387 *Cryptococcus neoformans* infection and induces a cytokine pattern distinct from IL-12. *J*  
388 *Immunol* 176:1098-106.
- 389 31. Angkasekwina P, Sringkarin N, Supasorn O, Fungkrajai M, Wang YH, Chayakulkeeree M,  
390 Ngamskulrunroj P, Angkasekwina N, Pattanapanyasat K. 2014. *Cryptococcus gattii* infection  
391 dampens Th1 and Th17 responses by attenuating dendritic cell function and pulmonary  
392 chemokine expression in the immunocompetent hosts. *Infect Immun* 82:3880-90.
- 393 32. Peck A, Mellins ED. 2010. Precarious balance: Th17 cells in host defense. *Infect Immun* 78:32-8.

- 394 33. Hardison SE, Wozniak KL, Kolls JK, Wormley FL, Jr. 2010. Interleukin-17 is not required for  
395 classical macrophage activation in a pulmonary mouse model of *Cryptococcus neoformans*  
396 infection. *Infect Immun* 78:5341-51.
- 397 34. Movahed E, Munusamy K, Tan GM, Looi CY, Tay ST, Wong WF. 2015. Genome-Wide  
398 Transcription Study of *Cryptococcus neoformans* H99 Clinical Strain versus Environmental  
399 Strains. *PLoS One* 10:e0137457.
- 400 35. Wozniak KL, Hardison SE, Kolls JK, Wormley FL. 2011. Role of IL-17A on resolution of pulmonary  
401 *C. neoformans* infection. *PLoS One* 6:e17204.
- 402 36. Chen S, Yan H, Zhang L, Kong W, Sun Y, Zhang W, Chen Y, Deng A. 2015. *Cryptococcus*  
403 *Neoformans* Infection and Immune Cell Regulation in Human Monocytes. *Cell Physiol Biochem*  
404 37:537-47.
- 405 37. Shourian M, Ralph B, Angers I, Sheppard DC, Qureshi ST. 2017. Contribution of IL-1RI Signaling to  
406 Protection against *Cryptococcus neoformans* 52D in a Mouse Model of Infection. *Front Immunol*  
407 8:1987.
- 408 38. Shoham S, Levitz SM. 2005. The immune response to fungal infections. *British journal of*  
409 *haematology* 129:569-582.
- 410 39. Snyderman DR, Singh N, Dromer F, Perfect JR, Lortholary O. 2008. Cryptococcosis in solid organ  
411 transplant recipients: current state of the science. *Clinical Infectious Diseases* 47:1321-1327.
- 412 40. Wozniak KL, Ravi S, Macias S, Young ML, Olszewski MA, Steele C, Wormley Jr FL. 2009. Insights  
413 into the mechanisms of protective immunity against *Cryptococcus neoformans* infection using a  
414 mouse model of pulmonary cryptococcosis. *PLoS One* 4:e6854.
- 415 41. Jarvis JN, Casazza JP, Stone HH, Meintjes G, Lawn SD, Levitz SM, Harrison TS, Koup RA. 2013. The  
416 phenotype of the *Cryptococcus*-specific CD4+ memory T-cell response is associated with disease

- 417 severity and outcome in HIV-associated cryptococcal meningitis. *The Journal of infectious*  
418 *diseases* 207:1817-1828.
- 419 42. Conti HR, Shen F, Nayyar N, Stocum E, Sun JN, Lindemann MJ, Ho AW, Hai JH, Jeffrey JY, Jung  
420 JW. 2009. Th17 cells and IL-17 receptor signaling are essential for mucosal host defense against  
421 oral candidiasis. *Journal of Experimental Medicine* 206:299-311.
- 422 43. Huang W, Na L, Fidel PL, Schwarzenberger P. 2004. Requirement of interleukin-17A for systemic  
423 anti-*Candida albicans* host defense in mice. *Journal of Infectious Diseases* 190:624-631.
- 424 44. Werner JL, Metz AE, Horn D, Schoeb TR, Hewitt MM, Schwiebert LM, Faro-Trindade I, Brown GD,  
425 Steele C. 2009. Requisite role for the dectin-1  $\beta$ -glucan receptor in pulmonary defense against  
426 *Aspergillus fumigatus*. *The Journal of Immunology* 182:4938-4946.
- 427 45. Huang W, Na L, Fidel PL, Schwarzenberger P. 2004. Requirement of interleukin-17A for systemic  
428 anti-*Candida albicans* host defense in mice. *J Infect Dis* 190:624-31.
- 429 46. Bozza S, Zelante T, Moretti S, Bonifazi P, DeLuca A, D'Angelo C, Giovannini G, Garlanda C, Boon L,  
430 Bistoni F, Puccetti P, Mantovani A, Romani L. 2008. Lack of Toll IL-1R8 exacerbates Th17 cell  
431 responses in fungal infection. *J Immunol* 180:4022-31.
- 432 47. Zelante T, Bozza S, De Luca A, D'Angelo C, Bonifazi P, Moretti S, Giovannini G, Bistoni F, Romani  
433 L. 2009. Th17 cells in the setting of *Aspergillus* infection and pathology. *Med Mycol* 47 Suppl  
434 1:S162-9.
- 435 48. Movahed E, Tan GM, Munusamy K, Yeow TC, Tay ST, Wong WF, Looi CY. 2016. Triclosan  
436 Demonstrates Synergic Effect with Amphotericin B and Fluconazole and Induces Apoptosis-Like  
437 Cell Death in *Cryptococcus neoformans*. *Front Microbiol* 7:360.
- 438 49. Tay ST, Chai HC, Na SL, Hamimah H, Rohani MY, Soo-Hoo TS. 2005. The isolation,  
439 characterization and antifungal susceptibilities of *Cryptococcus neoformans* from bird excreta in  
440 Klang Valley, Malaysia. *Mycopathologia* 159:509-13.



442 **FIGURE LEGENDS**

443

444 **FIG 1** Increased expression of cytokines in *C. neoformans*-infected macrophages. Quantitative  
445 real-time PCR result shows Relative expression levels of IL-6, IFN- $\gamma$  and IL-17 mRNA  
446 transcripts of the RAW264.7 cells uninfected (mock) or infected with *C. neoformans* H99 (Cn  
447 H99) for 24 hours. Data is mean  $\pm$  SD from one experiment run in triplicate, and is  
448 representative of two independent experiments. \* $P$ <0.05 by Student's *t*-test.

449

450 **FIG 2** Elevated serum IL-17A, IL-23 and IL-17F levels in the *C. neoformans*-infected mice.  
451 C57BL/6 mice (n=4 per group) were intranasally inoculated with  $1 \times 10^5$  cells of four different  
452 strains of *C. neoformans* (H99, S48B, S68B and H4), serum were collected after 14 days for Bio-  
453 plex cytokine array. Mock denotes control mice intranasally administrated with equal volume of  
454 PBS. Different cytokines in the T<sub>H</sub>17 panel, IL-17A (A), IL-23 (B), IL-17F (C), and IL-22 (D)  
455 were measured. \* $P$ <0.05, \*\* $P$ <0.01, *n.s.* : not significant or  $P \geq 0.05$ , by Student's *t*-test.

456

457 **FIG 3** Increased number of leukocytes in BALF and mLN of the *C. neoformans*-infected mice.  
458 IL-17A-EGFP reporter mice (n=4 per group) were uninfected (mock) or intranasally inoculated  
459 with  $1 \times 10^5$  cells with *C. neoformans* H99 strain (Cn H99), BALF, mLN and spleen were  
460 collected after 14 days for analysis. (A-C) Total number of cells in BALF, mLN and spleen. (D)  
461 Total numbers of different leukocytes after examination by flow cytometry analysis. \* $P$ <0.05,  
462 \*\* $P$ <0.01, *n.s.* : not significant or  $P \geq 0.05$ , by Student's *t*-test.

463

464 **FIG 4** Production of IL-17A by CD4<sup>+</sup> T helper cells. IL-17A-EGFP reporter mice (n=4 per  
465 group) were uninfected (mock) or intranasally inoculated with  $1 \times 10^5$  cells with *C. neoformans*  
466 H99 strain (Cn H99), BALF, mLN and spleen were collected after 14 days for analysis. (A–C)  
467 Number of GFP<sup>+</sup> cells among the CD4<sup>+</sup>– or CD8<sup>+</sup>–gated T cell populations in the BALF, mLN  
468 and spleen. \* $P < 0.05$ , \*\* $P < 0.01$ , \*\*\* $P < 0.001$ , *n.s.* : not significant or  $P \geq 0.05$ , by Student's *t*-test.  
469 (D) A representative flow cytometrical plot of GFP<sup>+</sup> cells in BALF, mLN and spleen among  
470 CD4<sup>+</sup>–gated T cells. % denotes the percentage of GFP<sup>+</sup> cells appear inside the gated area.

471

472 **FIG 5** Attenuated protective immunity to *C. neoformans* in the IL-17A deficient mice. (A)  
473 Survival curve of the control and *C. neoformans*-infected mice. IL-17A-KO mice (n=6 per  
474 group) were uninfected (mock) or intranasally inoculated with  $1 \times 10^5$  cells with *C. neoformans*  
475 H99 strain (Cn H99) and were observed closely over a period of 40 days. (B) Fungal burden of  
476 the control and *C. neoformans*-infected mice. IL-17A-KO mice (n=5 per group) were uninfected  
477 (mock) or intranasally inoculated with  $1 \times 10^5$  cells with *C. neoformans* H99 strain (Cn H99).  
478 Fungal CFU counts in the lung were quantitated after 14 days. Data is shown as mean  $\pm$  SD.

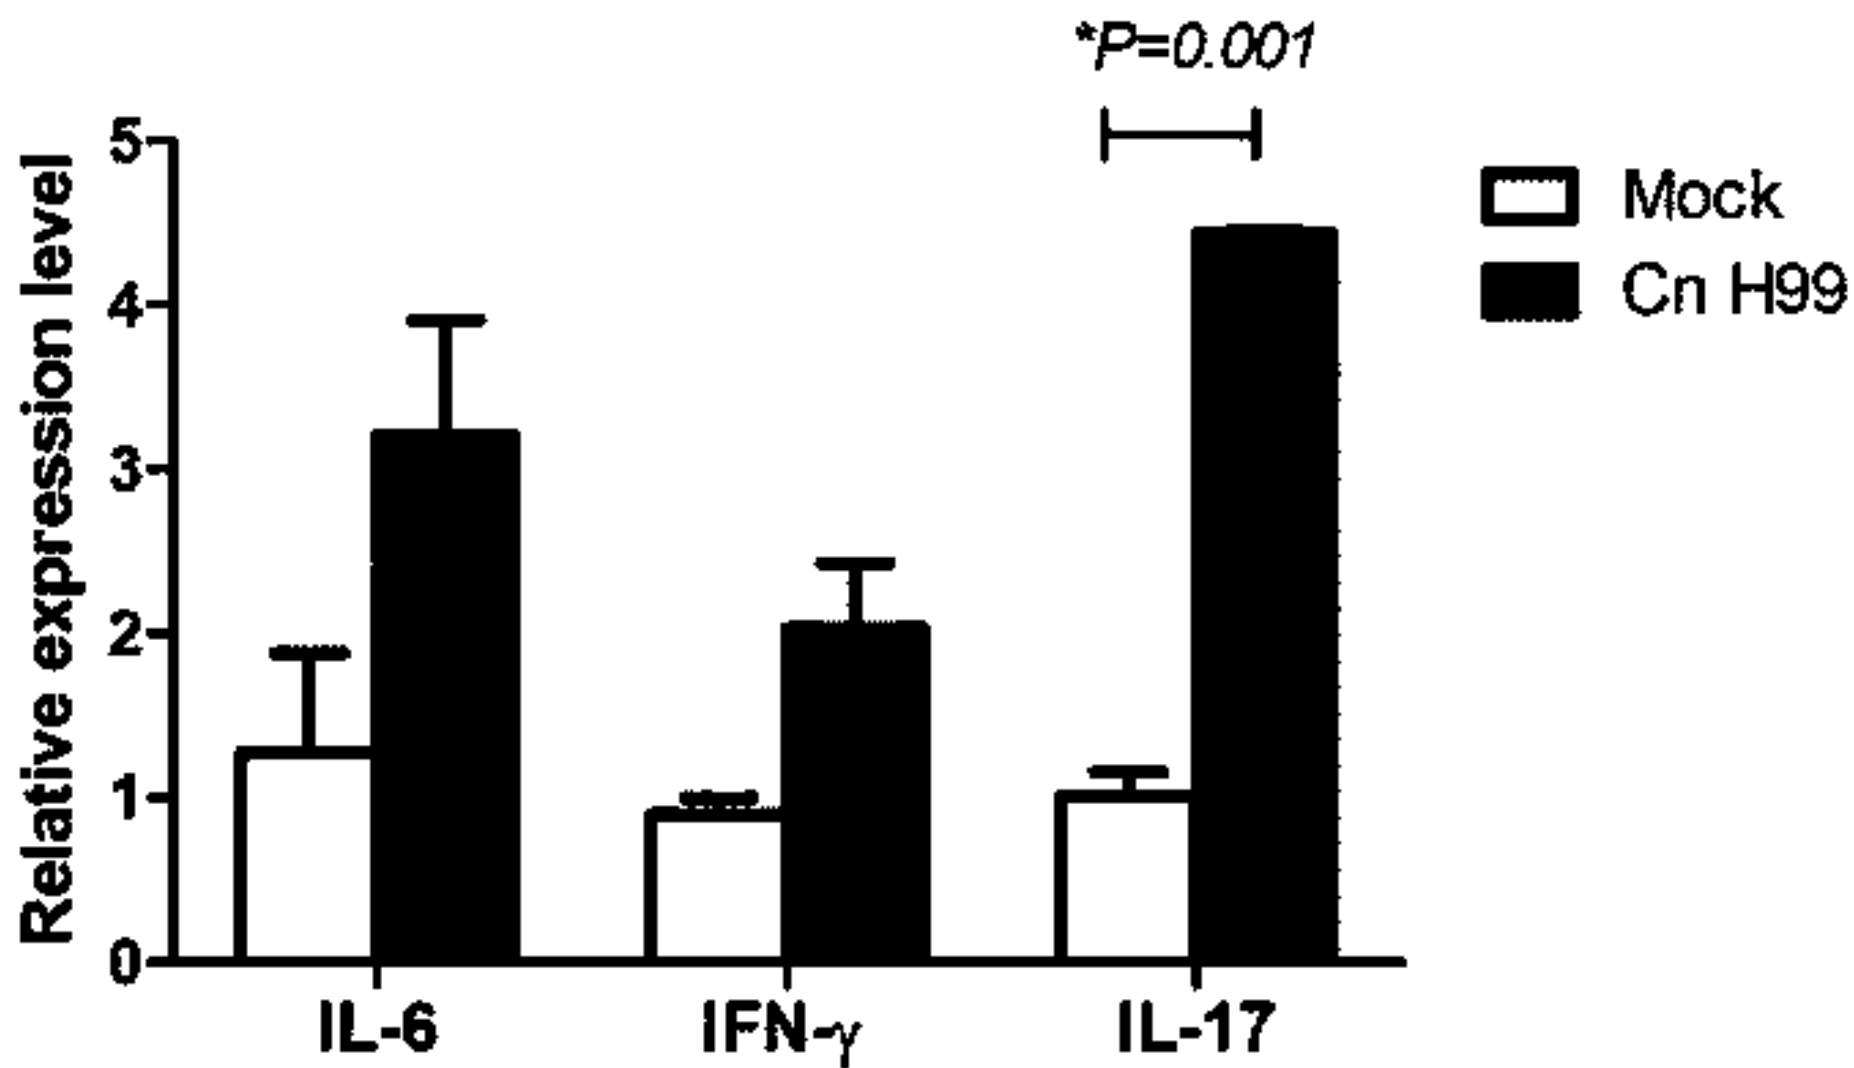



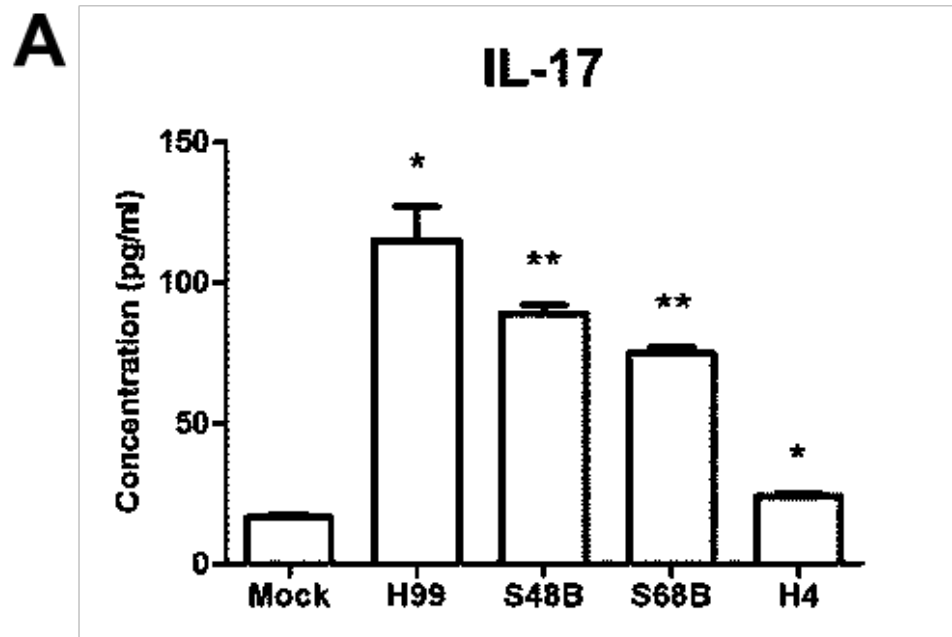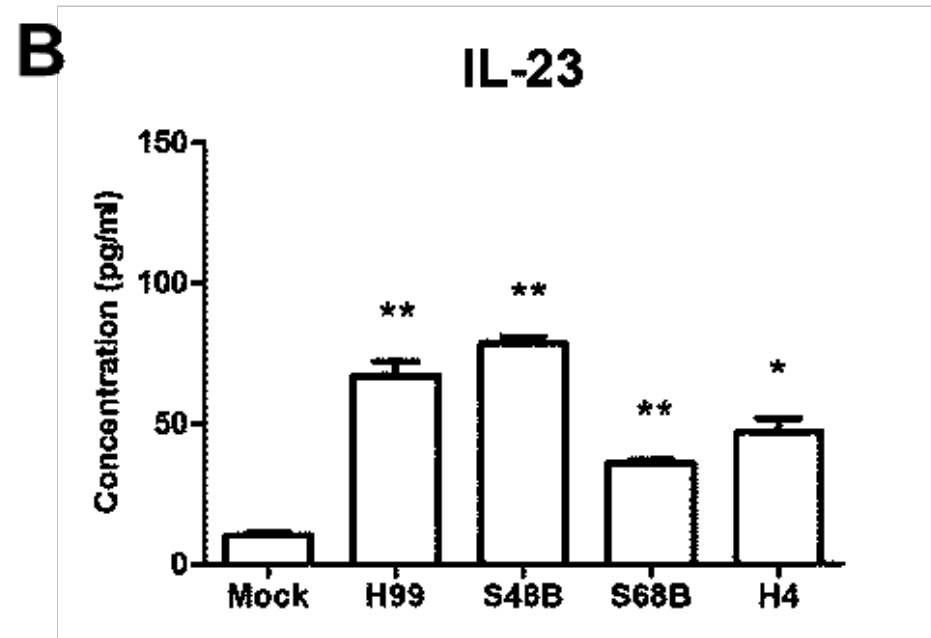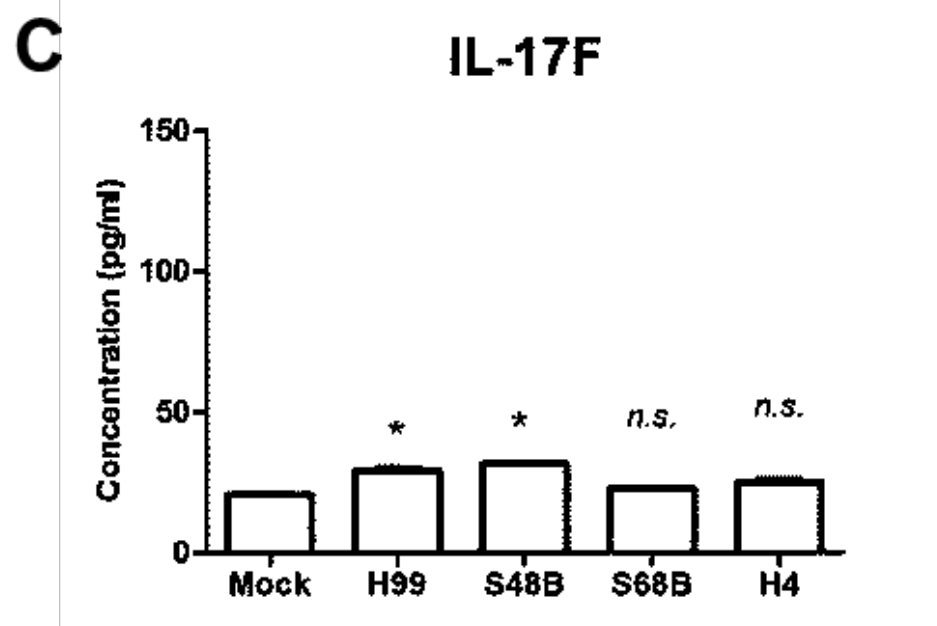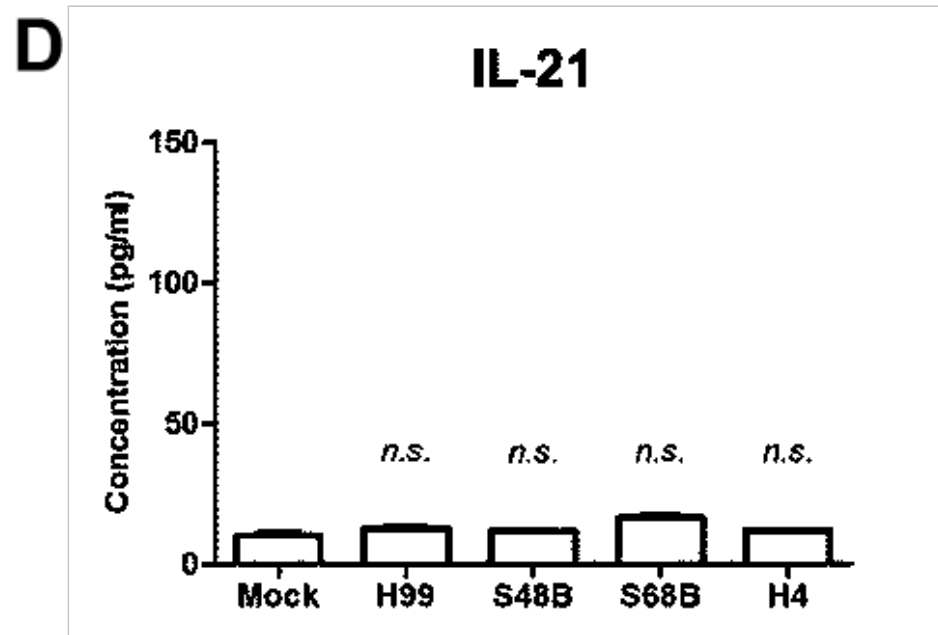

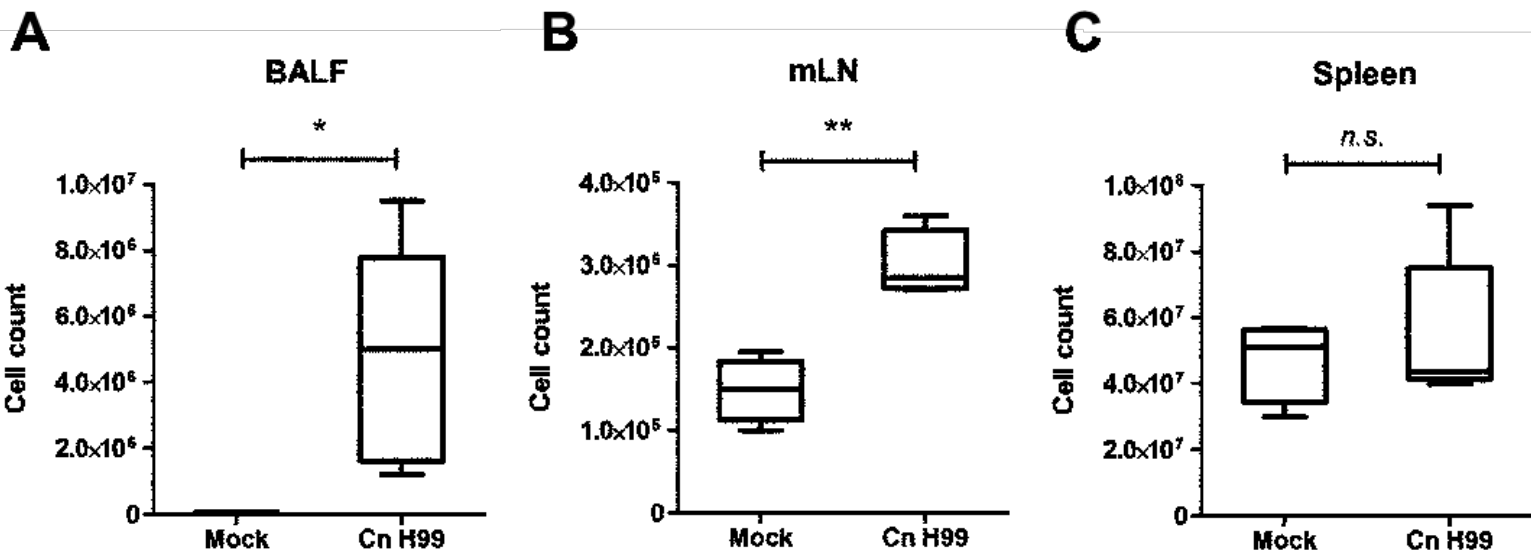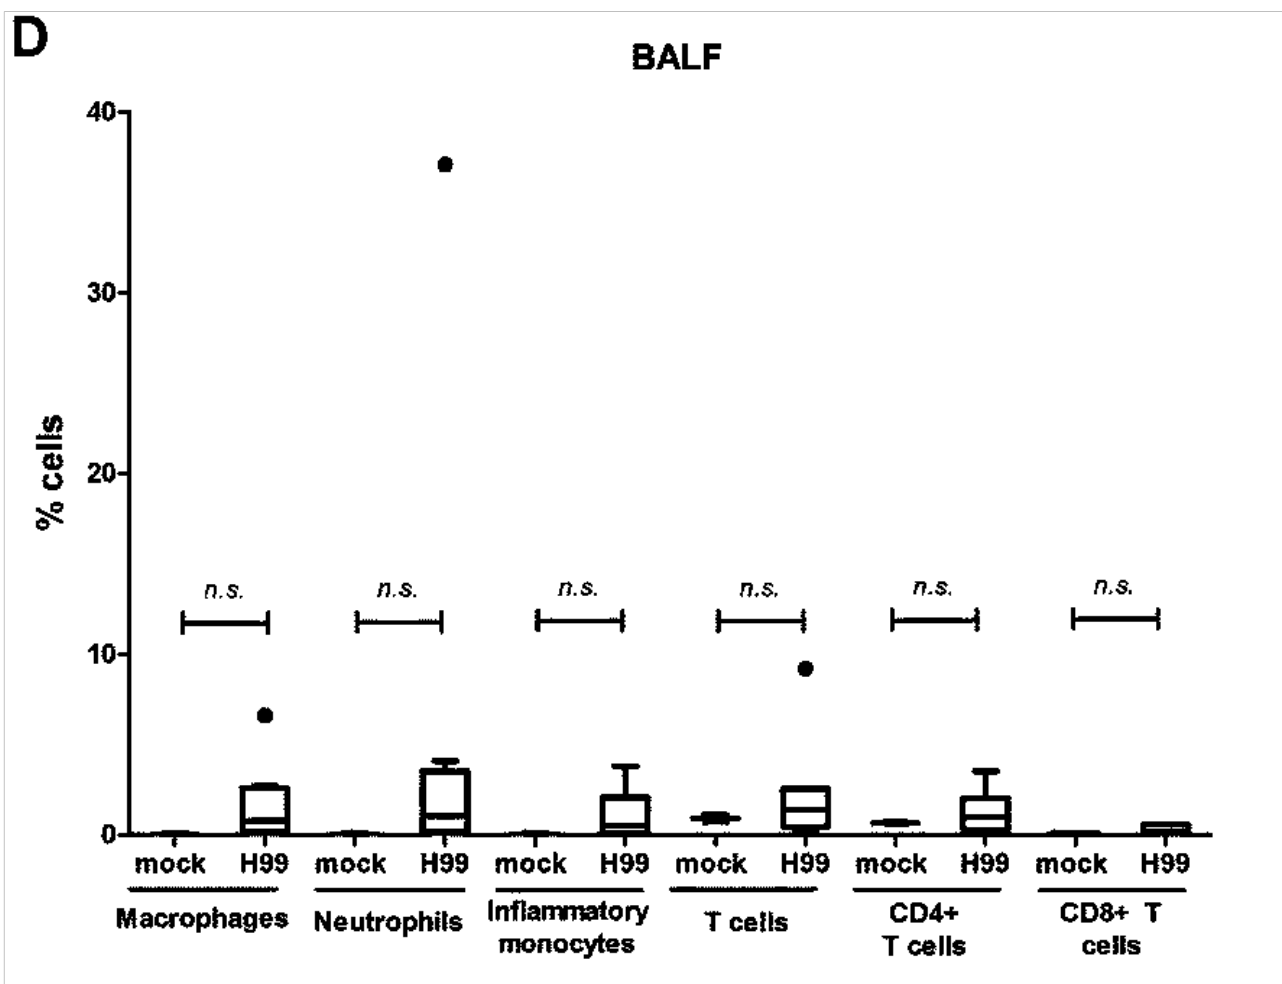

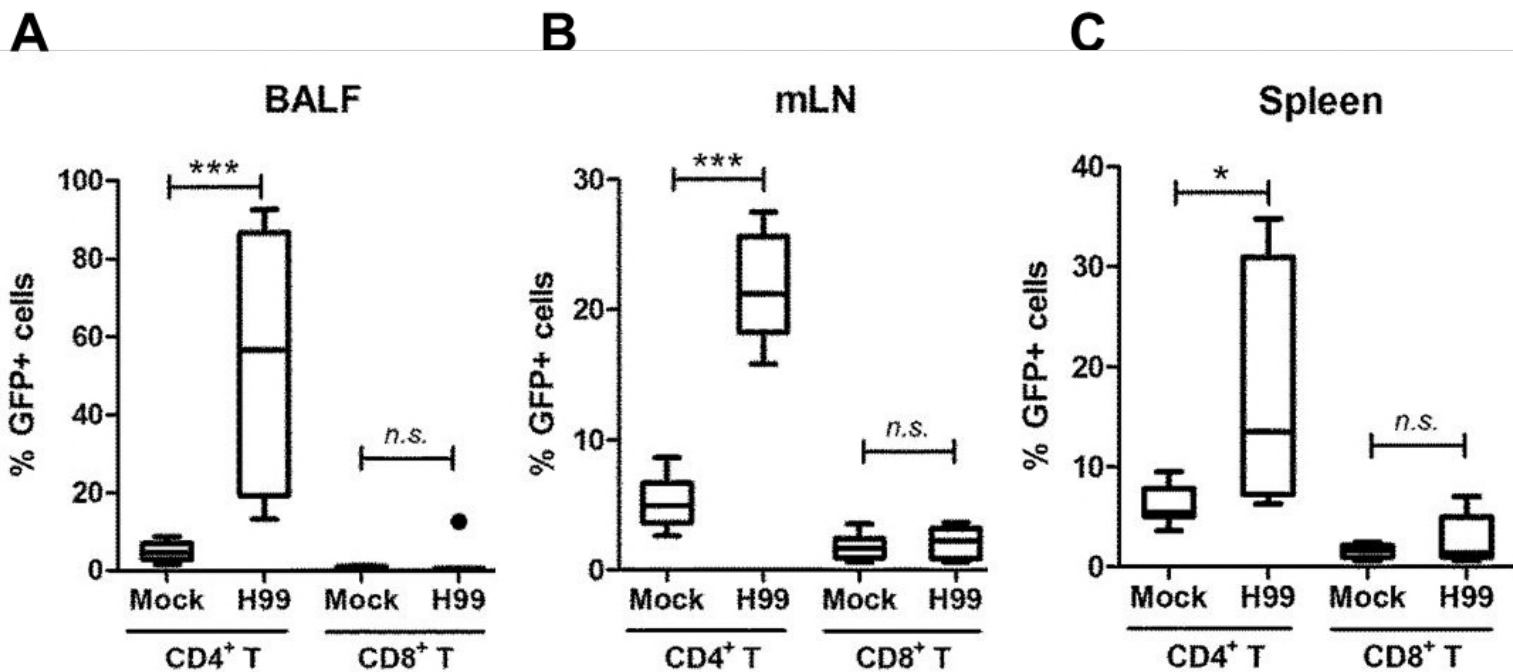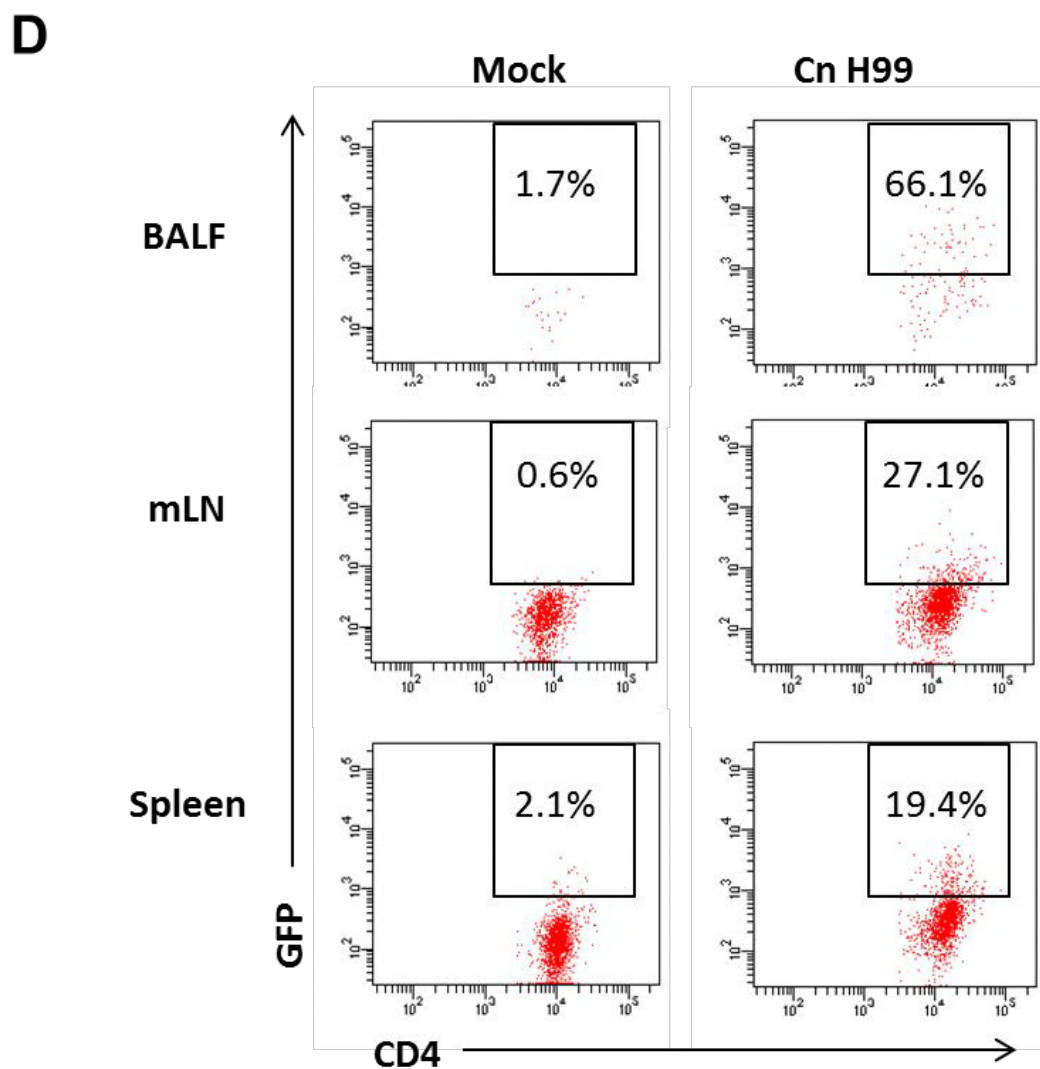

**A**

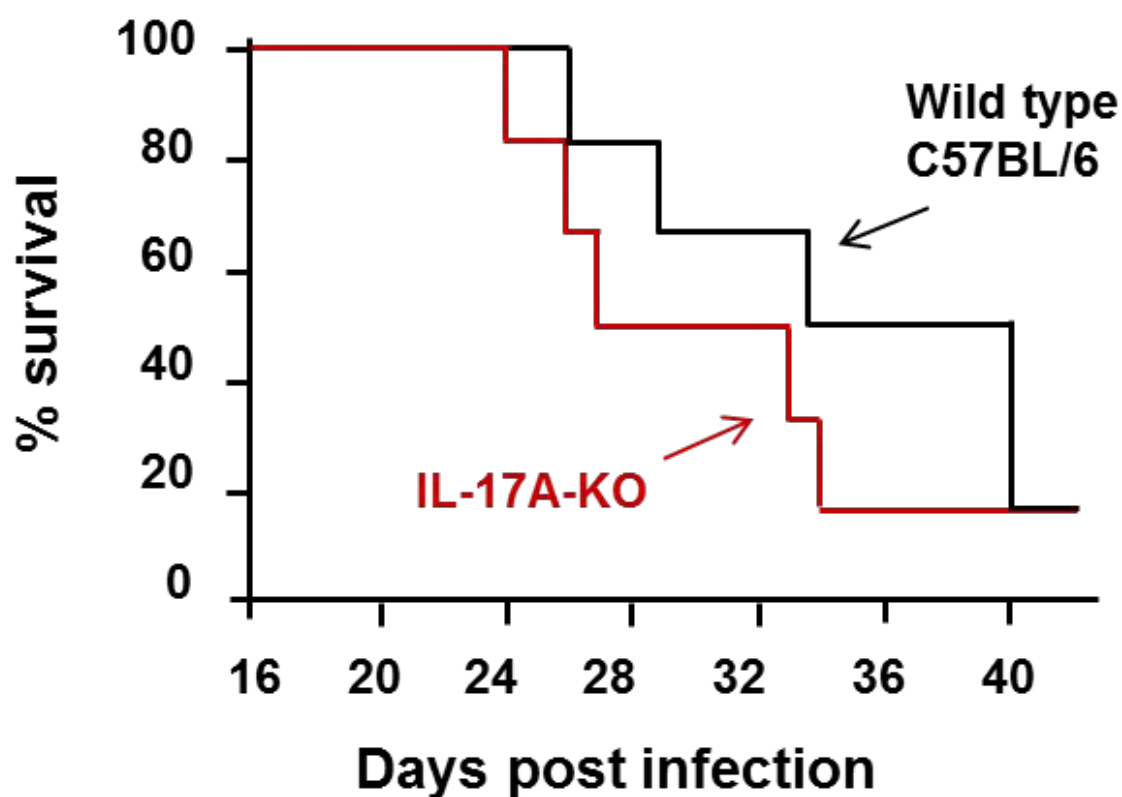

**B**

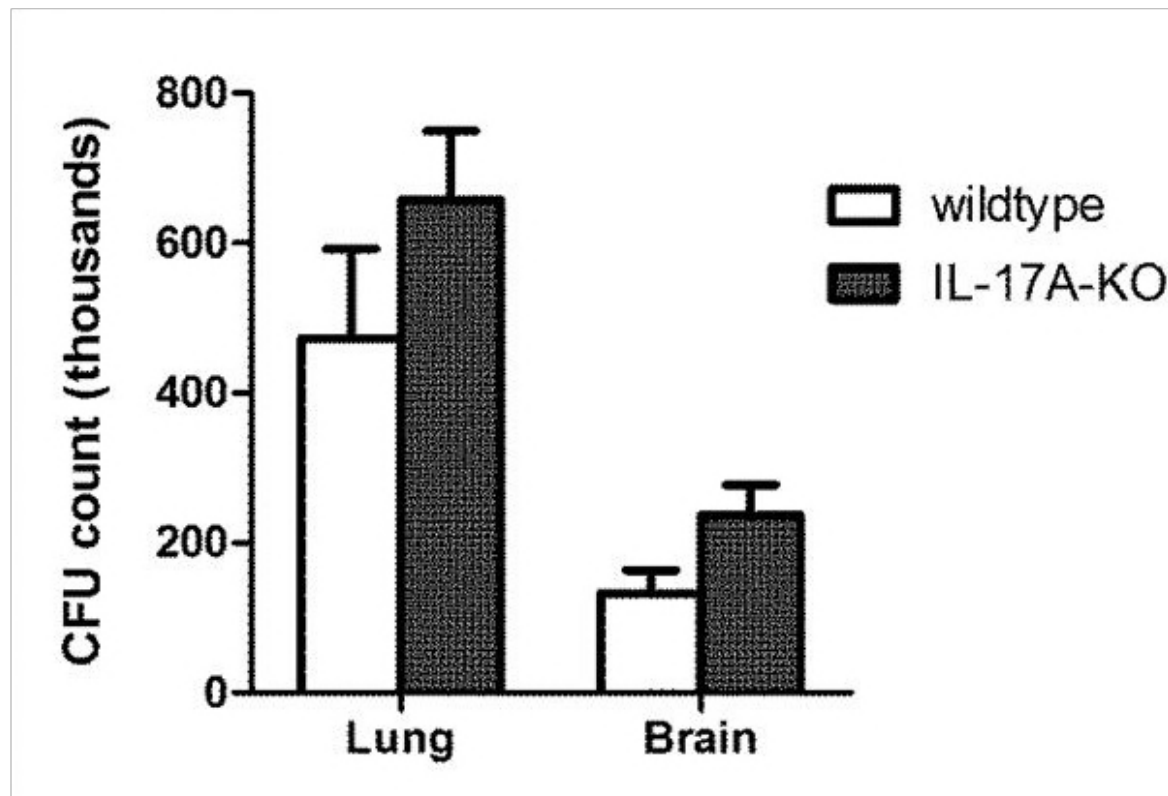

Source: https://www.biorxiv.org/content/10.1101/328005v1.full.pdf
